# Supplementary material
Source: publisher site journal article supplement (https://www.dovepress.com/article/274154)
Supplement: Supplementary file 1 [file get_supplementary_file.php]

**Supplementary**

Title: Why take bitter melon peptide in response to the threats of DM complications?

ID: 274154

Table a1. Average difference in gender

| Constructs | Gender | n | mean | s.d. | t | p |
| --- | --- | --- | --- | --- | --- | --- |
| Susceptibility | M | 149 | 4.15 | 0.85 | 2.16* | **.03** |
| F | 143 | 3.91 | 0.99 |  |  |
| Severity | M | 149 | 4.25 | 0.82 | 1.50 | .13 |
| F | 143 | 4.09 | 1.01 |  |  |
| Benefits | M | 149 | 3.90 | 0.79 | 1.26 | .21 |
| F | 143 | 3.78 | 0.84 |  |  |
| Barriers | M | 149 | 3.00 | 1.07 | 0.38 | .70 |
| F | 143 | 2.95 | 1.01 |  |  |
| Self-efficacy | M | 149 | 3.90 | 0.86 | 1.36 | .17 |
|  | F | 143 | 3.76 | 0.94 |  |  |
| BMP behavior | M | 149 | 3.95 | 0.94 | 1.67 | .10 |
| F | 143 | 3.76 | 0.98 |  |  |

*n=292; *p<0.05*, ***p<0.01,***p<0.001*

Table a2. Average difference in age

| Constructs | Age | n | mean | SE | F | p | Scheffe’s |
| --- | --- | --- | --- | --- | --- | --- | --- |
| Susceptibility | a | 84 | 3.81 | 0.89 | 4.07*** | .02 | c > a |
| b | 144 | 4.06 | 0.95 |  |  |  |
| c | 64 | 4.24 | 0.87 |  |  |  |
| Severity | a | 84 | 3.94 | 1.01 | 5.41*** | .00 | c > a |
| b | 144 | 4.18 | 0.94 |  |  |
| c | 64 | 4.44 | 0.62 |  |  |
| Benefits | a | 84 | 3.82 | 0.79 | 1.90 | .15 | - |
| b | 144 | 3.78 | 0.83 |  |  |  |
| c | 64 | 4.02 | 0.81 |  |  |  |
| Barriers | a | 84 | 2.84 | 1.00 | 1.76 | .17 | - |
| b | 144 | 2.97 | 1.01 |  |  |  |
| c | 64 | 3.16 | 1.17 |  |  |  |
| Self-efficacy | a | 84 | 3.79 | 0.99 | 0.95 | .39 | - |
| b | 144 | 3.80 | 0.89 |  |  |  |
| c | 64 | 3.97 | 0.81 |  |  |  |
| BMP behavior | a | 84 | 3.73 | 1.03 | 1.79 | .17 | - |
| b | 144 | 3.85 | 0.99 |  |  |  |
| c | 64 | 4.03 | 0.77 |  |  |  |

*n=292;* a. Under 39, b. 40-64, c. above 65; **p<0.05*, ***p<0.01,***p<0.001*

Table a3. Average difference in education

| Constructs | Edu. | n | mean | SE | F | p. | Scheffe’s | LSD |
| --- | --- | --- | --- | --- | --- | --- | --- | --- |
| Susceptibility | a | 100 | 3.77 | 0.93 | 3.90** | .01 | c > a | - |
| b | 68 | 4.17 | 1.04 |  |
| c | 78 | 4.18 | 0.82 |  |
| d | 29 | 4.05 | 0.83 |  |
| Severity | a | 100 | 3.91 | 0.95 | 4.72** | .01 | c > a | - |
| b | 68 | 4.24 | 0.99 |  |
| c | 78 | 4.38 | 0.69 |  |
| d | 29 | 4.30 | 0.70 |  |
| Benefits | a | 100 | 3.68 | 0.78 | 2.94* | .03 | n.s. | b, c >a |
| b | 68 | 3.94 | 0.88 |  |
| c | 78 | 3.99 | 0.72 |  |
| d | 29 | 3.72 | 0.77 |  |
| Barriers | a | 100 | 2.87 | 1.01 | 0.38 | .77 | - | - |
| b | 68 | 2.98 | 1.14 |  |
| c | 78 | 3.01 | 0.99 |  |
| d | 29 | 3.02 | 0.88 |  |
| Self-efficacy | a | 100 | 3.69 | 0.99 | 2.48 | .06 | - | - |
|  | b | 68 | 3.95 | 0.85 |  |  |  |  |
|  | c | 78 | 3.94 | 0.75 |  |  |  |  |
|  | d | 29 | 3.57 | 0.95 |  |  |  |  |
| BMP behavior | a | 100 | 3.70 | 1.07 | 1.80 | .15 | - | - |
| b | 68 | 4.00 | 0.84 |  |
| c | 78 | 3.91 | 0.90 |  |
| d | 29 | 3.68 | 1.00 |  |

*n=275;* a. Primary, b. Junior high school, c. High school, d. College; **p<0.05*, ***p<0.01,***p<0.001*

Table a4. Average difference in occupation

| Constructs | Age | n | mean | SE | F | p | Scheffe’s |
| --- | --- | --- | --- | --- | --- | --- | --- |
| Susceptibility | a | 108 | 4.17 | 0.83 | 3.43* | .03 | a > c |
| b | 61 | 4.08 | 0.87 |  |  |  |
| c | 115 | 3.85 | 1.03 |  |  |  |
| Severity | a | 108 | 4.32 | 0.81 | 4.49** | .01 | a > c |
| b | 61 | 4.24 | 0.78 |  |  |
| c | 115 | 3.96 | 1.05 |  |  |
| Benefits | a | 108 | 3.91 | 0.83 | 0.71 | .49 | - |
| b | 61 | 3.78 | 0.71 |  |  |  |
| c | 115 | 3.81 | 0.86 |  |  |  |
| Barriers | a | 108 | 2.93 | 1.10 | 1.09 | .34 | - |
| b | 61 | 3.11 | 0.91 |  |  |  |
| c | 115 | 2.88 | 1.04 |  |  |  |
| Self-efficacy | a | 108 | 4.05 | 0.83 | 6.38*** | .00 | a > c |
| b | 61 | 3.81 | 0.67 |  |  |  |
| c | 115 | 3.63 | 1.03 |  |  |  |
| BMP behavior | a | 108 | 4.06 | 0.85 | 5.85*** | .00 | a > c |
| b | 61 | 3.91 | 0.89 |  |  |  |
| c | 115 | 3.63 | 1.07 |  |  |  |

*n=284;* a. proprietor, b. wage earner, c. retired / jobless; **p<0.05*, ***p<0.01, ***p<0.001*

Table a5. Average difference in income

| Constructs | Edu. | n | mean | SE | F | p. | Scheffe’s |
| --- | --- | --- | --- | --- | --- | --- | --- |
| Susceptibility | a | 115 | 3.83 | 0.97 | 2.75* | .04 | d > a |
| b | 63 | 4.09 | 0.96 |
| c | 43 | 4.25 | 0.82 |
| d | 44 | 4.12 | 0.90 |
| Severity | a | 115 | 3.93 | 1.02 | 4.29** | .01 | c > a |
| b | 63 | 4.20 | 1.02 |
| c | 43 | 4.43 | 0.73 |
| d | 44 | 4.36 | 0.68 |
| Benefits | a | 115 | 3.69 | 0.83 | 4.56*** | .00 | c > a |
| b | 63 | 3.85 | 0.73 |
| c | 43 | 4.20 | 0.71 |
| d | 44 | 3.88 | 0.81 |
| Barriers | a | 115 | 2.89 | 0.98 | 2.31 | .08 |  |
| b | 63 | 3.05 | 0.98 |
| c | 43 | 2.60 | 1.12 |
| d | 44 | 3.10 | 1.01 |
| Self-efficacy | a | 115 | 3.69 | 1.02 | 3.65** | .01 | c > a |
|  | b | 63 | 3.88 | 0.77 |
|  | c | 43 | 4.20 | 0.64 |
|  | d | 44 | 3.85 | 0.83 |
| BMP behavior | a | 115 | 3.67 | 0.95 | 3.93** | .01 | c > a |
| b | 63 | 3.98 | 0.81 |
| c | 43 | 4.19 | 0.91 |
| d | 44 | 3.81 | 0.98 |

*n=269;* a. lower than U$ 667, b. U$ 667-1,000, c. U$1,001-1,333, d. more than U$1,333; **p<0.05*, ***p<0.01,***p<0.001*
